# Supplementary material for: Inhibition of MAN2A1 Enhances the Immune Response to Anti–PD-L1 in Human Tumors
Source: Oxford University Press journal article supplement (doi:10.1158/1078-0432.ccr-20-0778), 2020-07-28
Supplement: 10780432ccr200778-sup-238340_2_supp_6419758_qdpcx5.xlsx [file 10780432ccr200778-sup-238340_2_supp_6419758_qdpcx5.xlsx]

## Sheet: Sup.Table.S4
Sup.Table.S4: Gene sets enriched in Man2a1-null B16F10 tumors vs control tumors treated with IgG isotype control. Pre-ranked gene set enrichment analysis (GSEA) was used to perform the analysis.
NAME	GS<br> follow link to MSigDB	GS DETAILS	SIZE	ES	NES	NOM p-val	FDR q-val	FWER p-val	RANK AT MAX	LEADING EDGE
GO_OXIDATIVE_PHOSPHORYLATION	GO_OXIDATIVE_PHOSPHORYLATION	Details ...	126	0.698501	3.27602	0	0	0	2079	tags=58%, list=15%, signal=67%
GO_ATP_SYNTHESIS_COUPLED_ELECTRON_TRANSPORT	GO_ATP_SYNTHESIS_COUPLED_ELECTRON_TRANSPORT	Details ...	89	0.708105	3.08061	0	0	0	2079	tags=60%, list=15%, signal=70%
GO_RESPIRATORY_ELECTRON_TRANSPORT_CHAIN	GO_RESPIRATORY_ELECTRON_TRANSPORT_CHAIN	Details ...	108	0.663275	3.02508	0	0	0	2079	tags=53%, list=15%, signal=62%
GO_MITOCHONDRIAL_ELECTRON_TRANSPORT_NADH_TO_UBIQUINONE	GO_MITOCHONDRIAL_ELECTRON_TRANSPORT_NADH_TO_UBIQUINONE	Details ...	51	0.760012	2.98296	0	0	0	1989	tags=65%, list=14%, signal=75%
GO_ESTABLISHMENT_OF_PROTEIN_LOCALIZATION_TO_ENDOPLASMIC_RETICULUM	GO_ESTABLISHMENT_OF_PROTEIN_LOCALIZATION_TO_ENDOPLASMIC_RETICULUM	Details ...	85	0.664579	2.94513	0	0	0	2287	tags=60%, list=16%, signal=71%
GO_NADH_DEHYDROGENASE_COMPLEX_ASSEMBLY	GO_NADH_DEHYDROGENASE_COMPLEX_ASSEMBLY	Details ...	62	0.708242	2.9093	0	0	0	2137	tags=58%, list=15%, signal=68%
GO_COTRANSLATIONAL_PROTEIN_TARGETING_TO_MEMBRANE	GO_COTRANSLATIONAL_PROTEIN_TARGETING_TO_MEMBRANE	Details ...	75	0.682184	2.90839	0	0	0	2287	tags=64%, list=16%, signal=76%
GO_MITOCHONDRIAL_TRANSLATIONAL_TERMINATION	GO_MITOCHONDRIAL_TRANSLATIONAL_TERMINATION	Details ...	88	0.661545	2.86833	0	0	0	2965	tags=68%, list=21%, signal=86%
GO_MITOCHONDRIAL_TRANSLATION	GO_MITOCHONDRIAL_TRANSLATION	Details ...	134	0.607914	2.86241	0	0	0	2965	tags=57%, list=21%, signal=72%
GO_MITOCHONDRIAL_GENE_EXPRESSION	GO_MITOCHONDRIAL_GENE_EXPRESSION	Details ...	156	0.586158	2.85331	0	0	0	3462	tags=59%, list=25%, signal=78%
GO_MITOCHONDRIAL_RESPIRATORY_CHAIN_COMPLEX_ASSEMBLY	GO_MITOCHONDRIAL_RESPIRATORY_CHAIN_COMPLEX_ASSEMBLY	Details ...	91	0.631801	2.82582	0	0	0	2407	tags=49%, list=17%, signal=59%
GO_TRANSLATIONAL_TERMINATION	GO_TRANSLATIONAL_TERMINATION	Details ...	102	0.6183	2.77796	0	0	0	2965	tags=63%, list=21%, signal=79%
GO_CELLULAR_RESPIRATION	GO_CELLULAR_RESPIRATION	Details ...	180	0.566755	2.77582	0	0	0	2079	tags=42%, list=15%, signal=49%
GO_TRANSLATIONAL_ELONGATION	GO_TRANSLATIONAL_ELONGATION	Details ...	129	0.58283	2.76986	0	0	0	2965	tags=60%, list=21%, signal=75%
GO_CRISTAE_FORMATION	GO_CRISTAE_FORMATION	Details ...	28	0.801877	2.71614	0	0	0	1419	tags=64%, list=10%, signal=71%
GO_ELECTRON_TRANSPORT_CHAIN	GO_ELECTRON_TRANSPORT_CHAIN	Details ...	164	0.536579	2.61971	0	0	0	2091	tags=41%, list=15%, signal=48%
GO_TRANSLATIONAL_INITIATION	GO_TRANSLATIONAL_INITIATION	Details ...	158	0.5319	2.57555	0	0	0	2552	tags=46%, list=18%, signal=55%
GO_PROTEIN_LOCALIZATION_TO_ENDOPLASMIC_RETICULUM	GO_PROTEIN_LOCALIZATION_TO_ENDOPLASMIC_RETICULUM	Details ...	107	0.561117	2.55185	0	0	0	2287	tags=49%, list=16%, signal=58%
GO_AEROBIC_RESPIRATION	GO_AEROBIC_RESPIRATION	Details ...	82	0.591312	2.54382	0	0	0	2079	tags=45%, list=15%, signal=53%
GO_MUSCLE_FILAMENT_SLIDING	GO_MUSCLE_FILAMENT_SLIDING	Details ...	32	0.717782	2.54101	0	0	0	323	tags=34%, list=2%, signal=35%
GO_NUCLEAR_TRANSCRIBED_MRNA_CATABOLIC_PROCESS_NONSENSE_MEDIATED_DECAY	GO_NUCLEAR_TRANSCRIBED_MRNA_CATABOLIC_PROCESS_NONSENSE_MEDIATED_DECAY		97	0.564289	2.53412	0	0	0	2519	tags=52%, list=18%, signal=62%
GO_INNER_MITOCHONDRIAL_MEMBRANE_ORGANIZATION	GO_INNER_MITOCHONDRIAL_MEMBRANE_ORGANIZATION		41	0.667338	2.52311	0	0	0	2497	tags=59%, list=18%, signal=71%
GO_RIBOSOME_ASSEMBLY	GO_RIBOSOME_ASSEMBLY		51	0.620207	2.44137	0	0	0	2624	tags=53%, list=19%, signal=65%
GO_ENERGY_COUPLED_PROTON_TRANSPORT_DOWN_ELECTROCHEMICAL_GRADIENT	GO_ENERGY_COUPLED_PROTON_TRANSPORT_DOWN_ELECTROCHEMICAL_GRADIENT		20	0.754447	2.39708	0	0	0	1370	tags=65%, list=10%, signal=72%
GO_PROTON_TRANSMEMBRANE_TRANSPORT	GO_PROTON_TRANSMEMBRANE_TRANSPORT		128	0.497528	2.34924	0	2.20907e-05	0.001	2048	tags=40%, list=15%, signal=46%
GO_MITOCHONDRIAL_TRANSMEMBRANE_TRANSPORT	GO_MITOCHONDRIAL_TRANSMEMBRANE_TRANSPORT		82	0.53469	2.34218	0	2.12411e-05	0.001	3731	tags=60%, list=27%, signal=81%
GO_RIBOSOMAL_SMALL_SUBUNIT_BIOGENESIS	GO_RIBOSOMAL_SMALL_SUBUNIT_BIOGENESIS		57	0.595098	2.34055	0	2.04544e-05	0.001	2678	tags=51%, list=19%, signal=63%
GO_PROTEIN_TARGETING_TO_MEMBRANE	GO_PROTEIN_TARGETING_TO_MEMBRANE		151	0.481606	2.32878	0	3.89917e-05	0.002	2899	tags=46%, list=21%, signal=58%
