# Supplementary material for: Inhibition of MAN2A1 Enhances the Immune Response to Anti–PD-L1 in Human Tumors
Source: Oxford University Press journal article supplement (doi:10.1158/1078-0432.ccr-20-0778), 2020-07-28
Supplement: 10780432ccr200778-sup-238340_2_supp_6419760_qdpcx5.xlsx [file 10780432ccr200778-sup-238340_2_supp_6419760_qdpcx5.xlsx]

## Sheet: Sup.Table.S5
Sup.Table.S5: Gene sets enriched in control tumors treated with anti-PD-L1 vs IgG isotype control. Pre-ranked gene set enrichment analysis (GSEA) was used to perform the analysis.
NAME	GS<br> follow link to MSigDB	GS DETAILS	SIZE	ES	NES	NOM p-val	FDR q-val	FWER p-val	RANK AT MAX	LEADING EDGE
GO_OXIDATIVE_PHOSPHORYLATION	GO_OXIDATIVE_PHOSPHORYLATION	Details ...	131	0.733282	3.32568	0	0	0	1575	tags=60%, list=11%, signal=67%
GO_ATP_SYNTHESIS_COUPLED_ELECTRON_TRANSPORT	GO_ATP_SYNTHESIS_COUPLED_ELECTRON_TRANSPORT	Details ...	92	0.754318	3.32494	0	0	0	1575	tags=61%, list=11%, signal=68%
GO_RESPIRATORY_ELECTRON_TRANSPORT_CHAIN	GO_RESPIRATORY_ELECTRON_TRANSPORT_CHAIN	Details ...	110	0.721101	3.24789	0	0	0	1798	tags=58%, list=13%, signal=66%
GO_MITOCHONDRIAL_RESPIRATORY_CHAIN_COMPLEX_ASSEMBLY	GO_MITOCHONDRIAL_RESPIRATORY_CHAIN_COMPLEX_ASSEMBLY	Details ...	92	0.743882	3.21166	0	0	0	2264	tags=67%, list=16%, signal=80%
GO_MITOCHONDRIAL_ELECTRON_TRANSPORT_NADH_TO_UBIQUINONE	GO_MITOCHONDRIAL_ELECTRON_TRANSPORT_NADH_TO_UBIQUINONE	Details ...	52	0.804178	3.10922	0	0	0	1798	tags=75%, list=13%, signal=86%
GO_NADH_DEHYDROGENASE_COMPLEX_ASSEMBLY	GO_NADH_DEHYDROGENASE_COMPLEX_ASSEMBLY	Details ...	62	0.749563	3.06366	0	0	0	2001	tags=68%, list=15%, signal=79%
GO_ELECTRON_TRANSPORT_CHAIN	GO_ELECTRON_TRANSPORT_CHAIN	Details ...	166	0.620669	2.98275	0	0	0	1798	tags=43%, list=13%, signal=49%
GO_CELLULAR_RESPIRATION	GO_CELLULAR_RESPIRATION	Details ...	177	0.625728	2.98003	0	0	0	1681	tags=45%, list=12%, signal=50%
GO_MITOCHONDRIAL_TRANSLATIONAL_TERMINATION	GO_MITOCHONDRIAL_TRANSLATIONAL_TERMINATION	Details ...	88	0.690697	2.97388	0	0	0	2341	tags=65%, list=17%, signal=78%
GO_TRANSLATIONAL_INITIATION	GO_TRANSLATIONAL_INITIATION	Details ...	156	0.633815	2.96455	0	0	0	1980	tags=47%, list=14%, signal=54%
GO_COTRANSLATIONAL_PROTEIN_TARGETING_TO_MEMBRANE	GO_COTRANSLATIONAL_PROTEIN_TARGETING_TO_MEMBRANE	Details ...	75	0.701008	2.93706	0	0	0	2187	tags=60%, list=16%, signal=71%
GO_MITOCHONDRIAL_TRANSLATION	GO_MITOCHONDRIAL_TRANSLATION	Details ...	136	0.624333	2.88927	0	0	0	2259	tags=54%, list=16%, signal=64%
GO_ESTABLISHMENT_OF_PROTEIN_LOCALIZATION_TO_ENDOPLASMIC_RETICULUM	GO_ESTABLISHMENT_OF_PROTEIN_LOCALIZATION_TO_ENDOPLASMIC_RETICULUM	Details ...	86	0.679932	2.88692	0	0	0	2187	tags=58%, list=16%, signal=69%
GO_TRANSLATIONAL_ELONGATION	GO_TRANSLATIONAL_ELONGATION	Details ...	127	0.623485	2.86771	0	0	0	2259	tags=55%, list=16%, signal=65%
GO_TRANSLATIONAL_TERMINATION	GO_TRANSLATIONAL_TERMINATION	Details ...	102	0.645925	2.83799	0	0	0	2341	tags=60%, list=17%, signal=72%
GO_RIBOSOME_BIOGENESIS	GO_RIBOSOME_BIOGENESIS	Details ...	253	0.570008	2.82486	0	0	0	2807	tags=52%, list=20%, signal=64%
GO_MITOCHONDRIAL_GENE_EXPRESSION	GO_MITOCHONDRIAL_GENE_EXPRESSION	Details ...	161	0.599791	2.81722	0	0	0	2259	tags=52%, list=16%, signal=61%
GO_RIBONUCLEOPROTEIN_COMPLEX_BIOGENESIS	GO_RIBONUCLEOPROTEIN_COMPLEX_BIOGENESIS	Details ...	367	0.535778	2.78091	0	0	0	2427	tags=44%, list=18%, signal=52%
GO_RRNA_METABOLIC_PROCESS	GO_RRNA_METABOLIC_PROCESS	Details ...	197	0.55978	2.72695	0	0	0	2716	tags=51%, list=20%, signal=63%
GO_NUCLEAR_TRANSCRIBED_MRNA_CATABOLIC_PROCESS_NONSENSE_MEDIATED_DECAY	GO_NUCLEAR_TRANSCRIBED_MRNA_CATABOLIC_PROCESS_NONSENSE_MEDIATED_DECAY	Details ...	95	0.627074	2.70813	0	0	0	1980	tags=54%, list=14%, signal=62%
GO_CYTOPLASMIC_TRANSLATION	GO_CYTOPLASMIC_TRANSLATION		79	0.631512	2.66409	0	0	0	1572	tags=41%, list=11%, signal=45%
GO_RNA_SPLICING_VIA_TRANSESTERIFICATION_REACTIONS	GO_RNA_SPLICING_VIA_TRANSESTERIFICATION_REACTIONS		304	0.515073	2.65057	0	0	0	1988	tags=37%, list=14%, signal=42%
GO_PROTEIN_LOCALIZATION_TO_ENDOPLASMIC_RETICULUM	GO_PROTEIN_LOCALIZATION_TO_ENDOPLASMIC_RETICULUM		108	0.591754	2.646	0	0	0	2187	tags=52%, list=16%, signal=61%
GO_INNER_MITOCHONDRIAL_MEMBRANE_ORGANIZATION	GO_INNER_MITOCHONDRIAL_MEMBRANE_ORGANIZATION		42	0.69684	2.59931	0	0	0	1041	tags=43%, list=8%, signal=46%
GO_CHROMATIN_REMODELING_AT_CENTROMERE	GO_CHROMATIN_REMODELING_AT_CENTROMERE		32	0.740454	2.59699	0	0	0	1922	tags=59%, list=14%, signal=69%
GO_RIBOSOMAL_SMALL_SUBUNIT_BIOGENESIS	GO_RIBOSOMAL_SMALL_SUBUNIT_BIOGENESIS		61	0.653853	2.59442	0	0	0	2230	tags=57%, list=16%, signal=68%
GO_AEROBIC_RESPIRATION	GO_AEROBIC_RESPIRATION		84	0.608526	2.58358	0	0	0	2092	tags=44%, list=15%, signal=52%
GO_VIRAL_GENE_EXPRESSION	GO_VIRAL_GENE_EXPRESSION		162	0.542635	2.5477	0	0	0	1980	tags=40%, list=14%, signal=46%
GO_MRNA_PROCESSING	GO_MRNA_PROCESSING		439	0.473915	2.5354	0	0	0	2344	tags=39%, list=17%, signal=45%
GO_ATP_METABOLIC_PROCESS	GO_ATP_METABOLIC_PROCESS		268	0.503233	2.53415	0	0	0	1751	tags=35%, list=13%, signal=39%
GO_RNA_SPLICING	GO_RNA_SPLICING		385	0.484807	2.52243	0	0	0	1988	tags=36%, list=14%, signal=41%
GO_HISTONE_EXCHANGE	GO_HISTONE_EXCHANGE		41	0.688377	2.50584	0	0	0	1922	tags=49%, list=14%, signal=57%
GO_ENERGY_DERIVATION_BY_OXIDATION_OF_ORGANIC_COMPOUNDS	GO_ENERGY_DERIVATION_BY_OXIDATION_OF_ORGANIC_COMPOUNDS		250	0.49856	2.50045	0	0	0	1625	tags=33%, list=12%, signal=37%
GO_CENTROMERE_COMPLEX_ASSEMBLY	GO_CENTROMERE_COMPLEX_ASSEMBLY		40	0.677032	2.49961	0	0	0	2611	tags=65%, list=19%, signal=80%
GO_DNA_REPLICATION_INDEPENDENT_NUCLEOSOME_ORGANIZATION	GO_DNA_REPLICATION_INDEPENDENT_NUCLEOSOME_ORGANIZATION		39	0.703036	2.49887	0	0	0	1922	tags=59%, list=14%, signal=68%
GO_RNA_CATABOLIC_PROCESS	GO_RNA_CATABOLIC_PROCESS		346	0.477284	2.49045	0	0	0	2086	tags=37%, list=15%, signal=43%
GO_ATP_SYNTHESIS_COUPLED_PROTON_TRANSPORT	GO_ATP_SYNTHESIS_COUPLED_PROTON_TRANSPORT		19	0.777328	2.42428	0	0	0	1460	tags=68%, list=11%, signal=76%
GO_RIBOSOME_ASSEMBLY	GO_RIBOSOME_ASSEMBLY		48	0.636714	2.42383	0	0	0	2222	tags=52%, list=16%, signal=62%
GO_NCRNA_PROCESSING	GO_NCRNA_PROCESSING		332	0.468447	2.41455	0	0	0	2777	tags=42%, list=20%, signal=52%
GO_NUCLEAR_TRANSCRIBED_MRNA_CATABOLIC_PROCESS	GO_NUCLEAR_TRANSCRIBED_MRNA_CATABOLIC_PROCESS		173	0.506122	2.41377	0	0	0	1980	tags=43%, list=14%, signal=49%
GO_CYTOCHROME_COMPLEX_ASSEMBLY	GO_CYTOCHROME_COMPLEX_ASSEMBLY		32	0.686979	2.38974	0	0	0	2500	tags=56%, list=18%, signal=69%
GO_CRISTAE_FORMATION	GO_CRISTAE_FORMATION		29	0.709977	2.36522	0	1.40633e-05	0.001	1041	tags=48%, list=8%, signal=52%
GO_NEGATIVE_REGULATION_OF_CELL_CYCLE_G2_M_PHASE_TRANSITION	GO_NEGATIVE_REGULATION_OF_CELL_CYCLE_G2_M_PHASE_TRANSITION		95	0.536327	2.36352	0	1.37362e-05	0.001	2066	tags=37%, list=15%, signal=43%
GO_NCRNA_METABOLIC_PROCESS	GO_NCRNA_METABOLIC_PROCESS		415	0.443604	2.36089	0	1.3424e-05	0.001	2081	tags=34%, list=15%, signal=39%
GO_REGULATION_OF_CELLULAR_AMINO_ACID_METABOLIC_PROCESS	GO_REGULATION_OF_CELLULAR_AMINO_ACID_METABOLIC_PROCESS		58	0.585884	2.36073	0	1.31257e-05	0.001	1600	tags=38%, list=12%, signal=43%
GO_RIBOSOMAL_LARGE_SUBUNIT_BIOGENESIS	GO_RIBOSOMAL_LARGE_SUBUNIT_BIOGENESIS		52	0.616191	2.35815	0	1.28404e-05	0.001	2712	tags=54%, list=20%, signal=67%
GO_ANAPHASE_PROMOTING_COMPLEX_DEPENDENT_CATABOLIC_PROCESS	GO_ANAPHASE_PROMOTING_COMPLEX_DEPENDENT_CATABOLIC_PROCESS		76	0.565839	2.3581	0	1.25672e-05	0.001	1740	tags=38%, list=13%, signal=43%
GO_AEROBIC_ELECTRON_TRANSPORT_CHAIN	GO_AEROBIC_ELECTRON_TRANSPORT_CHAIN		20	0.757299	2.34747	0	2.45281e-05	0.002	1465	tags=55%, list=11%, signal=61%
GO_RIBONUCLEOPROTEIN_COMPLEX_SUBUNIT_ORGANIZATION	GO_RIBONUCLEOPROTEIN_COMPLEX_SUBUNIT_ORGANIZATION		165	0.487734	2.31602	0	2.40275e-05	0.002	2322	tags=39%, list=17%, signal=46%
GO_CYTOPLASMIC_TRANSLATIONAL_INITIATION	GO_CYTOPLASMIC_TRANSLATIONAL_INITIATION		29	0.682295	2.3138	0	2.3547e-05	0.002	2234	tags=48%, list=16%, signal=58%
GO_REGULATION_OF_CELLULAR_AMINE_METABOLIC_PROCESS	GO_REGULATION_OF_CELLULAR_AMINE_METABOLIC_PROCESS		72	0.553197	2.30356	0	3.46597e-05	0.003	1600	tags=33%, list=12%, signal=38%
GO_REGULATION_OF_ATPASE_ACTIVITY	GO_REGULATION_OF_ATPASE_ACTIVITY		70	0.551096	2.28108	0	6.74369e-05	0.006	1468	tags=33%, list=11%, signal=37%
GO_TELOMERASE_RNA_LOCALIZATION	GO_TELOMERASE_RNA_LOCALIZATION		19	0.730561	2.2712	0	7.73641e-05	0.007	2634	tags=63%, list=19%, signal=78%
GO_PROTEIN_DNA_COMPLEX_SUBUNIT_ORGANIZATION	GO_PROTEIN_DNA_COMPLEX_SUBUNIT_ORGANIZATION		192	0.464872	2.25208	0	0.000130625	0.012	2120	tags=35%, list=15%, signal=41%
GO_CHROMATIN_ASSEMBLY	GO_CHROMATIN_ASSEMBLY		81	0.523437	2.24704	0	0.000138917	0.013	2037	tags=37%, list=15%, signal=43%
GO_RNA_CAPPING	GO_RNA_CAPPING		33	0.648498	2.23863	0	0.000146869	0.014	2945	tags=64%, list=21%, signal=81%
GO_RNA_LOCALIZATION	GO_RNA_LOCALIZATION		208	0.451933	2.23377	0	0.000154381	0.015	2055	tags=35%, list=15%, signal=41%
GO_ESTABLISHMENT_OF_PROTEIN_LOCALIZATION_TO_MITOCHONDRIAL_MEMBRANE	GO_ESTABLISHMENT_OF_PROTEIN_LOCALIZATION_TO_MITOCHONDRIAL_MEMBRANE		17	0.74724	2.21671	0	0.000212074	0.021	1875	tags=53%, list=14%, signal=61%
GO_PROTEASOMAL_UBIQUITIN_INDEPENDENT_PROTEIN_CATABOLIC_PROCESS	GO_PROTEASOMAL_UBIQUITIN_INDEPENDENT_PROTEIN_CATABOLIC_PROCESS		21	0.705073	2.21525	0	0.000218429	0.022	1600	tags=48%, list=12%, signal=54%
GO_MITOCHONDRION_ORGANIZATION	GO_MITOCHONDRION_ORGANIZATION		478	0.414897	2.20962	0	0.00023452	0.024	2700	tags=38%, list=20%, signal=46%
GO_MATURATION_OF_SSU_RRNA	GO_MATURATION_OF_SSU_RRNA		44	0.587421	2.20686	0	0.000230676	0.024	2427	tags=52%, list=18%, signal=63%
GO_REGULATION_OF_TRANSCRIPTION_FROM_RNA_POLYMERASE_II_PROMOTER_IN_RESPONSE_TO_HYPOXIA	GO_REGULATION_OF_TRANSCRIPTION_FROM_RNA_POLYMERASE_II_PROMOTER_IN_RESPONSE_TO_HYPOXIA		75	0.529686	2.20642	0	0.00023603	0.025	1600	tags=33%, list=12%, signal=38%
GO_MRNA_CIS_SPLICING_VIA_SPLICEOSOME	GO_MRNA_CIS_SPLICING_VIA_SPLICEOSOME		27	0.663456	2.19838	0	0.000259929	0.028	1973	tags=48%, list=14%, signal=56%
GO_DNA_PACKAGING	GO_DNA_PACKAGING		116	0.488595	2.19826	0	0.000255867	0.028	1922	tags=31%, list=14%, signal=36%
GO_CELLULAR_NITROGEN_COMPOUND_CATABOLIC_PROCESS	GO_CELLULAR_NITROGEN_COMPOUND_CATABOLIC_PROCESS		486	0.405273	2.19074	0	0.000269696	0.03	2086	tags=30%, list=15%, signal=34%
GO_RNA_3_END_PROCESSING	GO_RNA_3_END_PROCESSING		127	0.476993	2.18985	0	0.000265609	0.03	2059	tags=37%, list=15%, signal=43%
GO_PROTEIN_FOLDING	GO_PROTEIN_FOLDING		188	0.456315	2.18372	0	0.000305935	0.035	2445	tags=39%, list=18%, signal=47%
GO_NUCLEOTIDE_EXCISION_REPAIR_PREINCISION_COMPLEX_ASSEMBLY	GO_NUCLEOTIDE_EXCISION_REPAIR_PREINCISION_COMPLEX_ASSEMBLY		29	0.626547	2.18148	0	0.000309924	0.036	1867	tags=48%, list=14%, signal=56%
GO_PROTON_TRANSMEMBRANE_TRANSPORT	GO_PROTON_TRANSMEMBRANE_TRANSPORT		124	0.473298	2.18148	0	0.000305433	0.036	1585	tags=31%, list=12%, signal=34%
GO_POSITIVE_REGULATION_OF_ATPASE_ACTIVITY	GO_POSITIVE_REGULATION_OF_ATPASE_ACTIVITY		49	0.579402	2.17026	0	0.000393375	0.046	1468	tags=37%, list=11%, signal=41%
GO_TRANSCRIPTION_COUPLED_NUCLEOTIDE_EXCISION_REPAIR	GO_TRANSCRIPTION_COUPLED_NUCLEOTIDE_EXCISION_REPAIR		71	0.519492	2.16729	0	0.000387834	0.046	2008	tags=37%, list=15%, signal=43%
GO_POSITIVE_REGULATION_OF_TELOMERASE_RNA_LOCALIZATION_TO_CAJAL_BODY	GO_POSITIVE_REGULATION_OF_TELOMERASE_RNA_LOCALIZATION_TO_CAJAL_BODY		15	0.768263	2.164	0	0.000390955	0.047	2634	tags=80%, list=19%, signal=99%
GO_MITOCHONDRIAL_MEMBRANE_ORGANIZATION	GO_MITOCHONDRIAL_MEMBRANE_ORGANIZATION		118	0.48315	2.15841	0	0.000401666	0.048	2687	tags=44%, list=20%, signal=54%
GO_ALTERNATIVE_MRNA_SPLICING_VIA_SPLICEOSOME	GO_ALTERNATIVE_MRNA_SPLICING_VIA_SPLICEOSOME		66	0.526247	2.15606	0	0.000396238	0.048	1816	tags=35%, list=13%, signal=40%
