# Supplementary material for: Inhibition of MAN2A1 Enhances the Immune Response to Anti–PD-L1 in Human Tumors
Source: Oxford University Press journal article supplement (doi:10.1158/1078-0432.ccr-20-0778), 2020-07-28
Supplement: 10780432ccr200778-sup-238340_2_supp_6419761_qdpcx5.xlsx [file 10780432ccr200778-sup-238340_2_supp_6419761_qdpcx5.xlsx]

## Sheet: Sup.Table.S6
Sup.Table.S6: Gene sets enriched in B16F10 tumors treated with anti-PD-L1 + swainsonine vs swainsonine + IgG. Pre-ranked gene set enrichment analysis (GSEA) was used to perform the analysis.
NAME	GS<br> follow link to MSigDB	GS DETAILS	SIZE	ES	NES	NOM p-val	FDR q-val	FWER p-val	RANK AT MAX	LEADING EDGE
GO_ADAPTIVE_IMMUNE_RESPONSE	GO_ADAPTIVE_IMMUNE_RESPONSE	Details ...	321	0.559817	2.87524	0	0	0	2263	tags=48%, list=16%, signal=56%
GO_INTERFERON_GAMMA_PRODUCTION	GO_INTERFERON_GAMMA_PRODUCTION	Details ...	83	0.648906	2.76805	0	0	0	2144	tags=57%, list=15%, signal=66%
GO_T_CELL_ACTIVATION	GO_T_CELL_ACTIVATION	Details ...	385	0.514744	2.71946	0	0	0	3121	tags=47%, list=22%, signal=59%
GO_B_CELL_RECEPTOR_SIGNALING_PATHWAY	GO_B_CELL_RECEPTOR_SIGNALING_PATHWAY	Details ...	55	0.678279	2.65625	0	0	0	1226	tags=47%, list=9%, signal=52%
GO_ANTIGEN_RECEPTOR_MEDIATED_SIGNALING_PATHWAY	GO_ANTIGEN_RECEPTOR_MEDIATED_SIGNALING_PATHWAY	Details ...	209	0.531399	2.61202	0	0	0	1402	tags=35%, list=10%, signal=38%
GO_LYMPHOCYTE_MEDIATED_IMMUNITY	GO_LYMPHOCYTE_MEDIATED_IMMUNITY	Details ...	194	0.533861	2.60363	0	0	0	2142	tags=44%, list=15%, signal=51%
GO_ALPHA_BETA_T_CELL_ACTIVATION	GO_ALPHA_BETA_T_CELL_ACTIVATION	Details ...	119	0.576782	2.58538	0	0	0	2875	tags=52%, list=20%, signal=65%
GO_LEUKOCYTE_PROLIFERATION	GO_LEUKOCYTE_PROLIFERATION	Details ...	233	0.519745	2.57774	0	0	0	1951	tags=39%, list=14%, signal=45%
GO_POSITIVE_REGULATION_OF_LEUKOCYTE_CELL_CELL_ADHESION	GO_POSITIVE_REGULATION_OF_LEUKOCYTE_CELL_CELL_ADHESION	Details ...	181	0.530013	2.56477	0	0	0	2161	tags=39%, list=15%, signal=46%
GO_POSITIVE_REGULATION_OF_CELL_ACTIVATION	GO_POSITIVE_REGULATION_OF_CELL_ACTIVATION	Details ...	274	0.506589	2.55383	0	0	0	2161	tags=38%, list=15%, signal=44%
GO_ADAPTIVE_IMMUNE_RESPONSE_BASED_ON_SOMATIC_RECOMBINATION_OF_IMMUNE_RECEPTORS_BUILT_FROM_IMMUNOGLOBULIN_SUPERFAMILY_DOMAINS	GO_ADAPTIVE_IMMUNE_RESPONSE_BASED_ON_SOMATIC_RECOMBINATION_OF_IMMUNE_RECEPTORS_BUILT_FROM_IMMUNOGLOBULIN_SUPERFAMILY_DOMAINS	Details ...	209	0.517986	2.55343	0	0	0	2196	tags=44%, list=16%, signal=51%
GO_REGULATION_OF_CELL_ACTIVATION	GO_REGULATION_OF_CELL_ACTIVATION	Details ...	461	0.474339	2.54722	0	0	0	3134	tags=43%, list=22%, signal=54%
GO_EXTERNAL_SIDE_OF_PLASMA_MEMBRANE	GO_EXTERNAL_SIDE_OF_PLASMA_MEMBRANE	Details ...	250	0.507532	2.54243	0	0	0	1728	tags=33%, list=12%, signal=37%
GO_POSITIVE_REGULATION_OF_INTERFERON_GAMMA_PRODUCTION	GO_POSITIVE_REGULATION_OF_INTERFERON_GAMMA_PRODUCTION	Details ...	50	0.656219	2.53665	0	0	0	2142	tags=56%, list=15%, signal=66%
GO_REGULATION_OF_T_CELL_ACTIVATION	GO_REGULATION_OF_T_CELL_ACTIVATION	Details ...	261	0.503481	2.53611	0	0	0	3121	tags=46%, list=22%, signal=58%
GO_T_CELL_DIFFERENTIATION	GO_T_CELL_DIFFERENTIATION	Details ...	216	0.513821	2.53502	0	0	0	3232	tags=48%, list=23%, signal=61%
GO_REGULATION_OF_LYMPHOCYTE_ACTIVATION	GO_REGULATION_OF_LYMPHOCYTE_ACTIVATION	Details ...	359	0.481008	2.51823	0	0	0	3134	tags=45%, list=22%, signal=56%
GO_T_CELL_ACTIVATION_INVOLVED_IN_IMMUNE_RESPONSE	GO_T_CELL_ACTIVATION_INVOLVED_IN_IMMUNE_RESPONSE	Details ...	77	0.595708	2.51671	0	0	0	2142	tags=45%, list=15%, signal=53%
GO_LEUKOCYTE_CELL_CELL_ADHESION	GO_LEUKOCYTE_CELL_CELL_ADHESION	Details ...	278	0.496264	2.51362	0	0	0	1305	tags=32%, list=9%, signal=35%
GO_CELL_KILLING	GO_CELL_KILLING	Details ...	91	0.580348	2.50619	0	0	0	3276	tags=56%, list=23%, signal=73%
GO_POSITIVE_T_CELL_SELECTION	GO_POSITIVE_T_CELL_SELECTION		31	0.720844	2.49918	0	0	0	2021	tags=61%, list=14%, signal=71%
GO_NEGATIVE_REGULATION_OF_CELL_ACTIVATION	GO_NEGATIVE_REGULATION_OF_CELL_ACTIVATION		166	0.523292	2.48942	0	0	0	2308	tags=43%, list=16%, signal=51%
GO_T_CELL_SELECTION	GO_T_CELL_SELECTION		44	0.666172	2.48415	0	0	0	1305	tags=48%, list=9%, signal=52%
GO_REGULATION_OF_LEUKOCYTE_PROLIFERATION	GO_REGULATION_OF_LEUKOCYTE_PROLIFERATION		177	0.519898	2.47683	0	0	0	2197	tags=41%, list=16%, signal=48%
GO_NEGATIVE_REGULATION_OF_LYMPHOCYTE_ACTIVATION	GO_NEGATIVE_REGULATION_OF_LYMPHOCYTE_ACTIVATION		121	0.540213	2.47097	0	0	0	2308	tags=47%, list=16%, signal=56%
GO_MAST_CELL_ACTIVATION	GO_MAST_CELL_ACTIVATION		50	0.646231	2.45868	0	0	0	950	tags=42%, list=7%, signal=45%
GO_T_CELL_PROLIFERATION	GO_T_CELL_PROLIFERATION		150	0.525626	2.45072	0	0	0	1941	tags=39%, list=14%, signal=45%
GO_T_CELL_RECEPTOR_SIGNALING_PATHWAY	GO_T_CELL_RECEPTOR_SIGNALING_PATHWAY		167	0.514497	2.43967	0	0	0	1635	tags=35%, list=12%, signal=39%
GO_B_CELL_MEDIATED_IMMUNITY	GO_B_CELL_MEDIATED_IMMUNITY		96	0.556741	2.43432	0	0	0	2120	tags=46%, list=15%, signal=54%
GO_LEUKOCYTE_MEDIATED_CYTOTOXICITY	GO_LEUKOCYTE_MEDIATED_CYTOTOXICITY		72	0.58954	2.42253	0	0	0	3276	tags=60%, list=23%, signal=77%
GO_INTERLEUKIN_10_PRODUCTION	GO_INTERLEUKIN_10_PRODUCTION		42	0.650478	2.4042	0	0	0	1851	tags=62%, list=13%, signal=71%
GO_REGULATION_OF_ANTIGEN_RECEPTOR_MEDIATED_SIGNALING_PATHWAY	GO_REGULATION_OF_ANTIGEN_RECEPTOR_MEDIATED_SIGNALING_PATHWAY		53	0.619872	2.39434	0	0	0	1402	tags=42%, list=10%, signal=46%
GO_NATURAL_KILLER_CELL_ACTIVATION	GO_NATURAL_KILLER_CELL_ACTIVATION		50	0.624887	2.39407	0	0	0	3127	tags=68%, list=22%, signal=87%
GO_TUMOR_NECROSIS_FACTOR_SUPERFAMILY_CYTOKINE_PRODUCTION	GO_TUMOR_NECROSIS_FACTOR_SUPERFAMILY_CYTOKINE_PRODUCTION		132	0.521967	2.39275	0	0	0	1941	tags=39%, list=14%, signal=45%
GO_T_CELL_RECEPTOR_COMPLEX	GO_T_CELL_RECEPTOR_COMPLEX		24	0.734163	2.39174	0	0	0	1660	tags=67%, list=12%, signal=75%
GO_IMMUNE_RECEPTOR_ACTIVITY	GO_IMMUNE_RECEPTOR_ACTIVITY		100	0.542549	2.39119	0	0	0	2629	tags=47%, list=19%, signal=57%
GO_LEUKOCYTE_MIGRATION	GO_LEUKOCYTE_MIGRATION		353	0.45782	2.39096	0	0	0	2845	tags=41%, list=20%, signal=49%
GO_POSITIVE_REGULATION_OF_CELL_CELL_ADHESION	GO_POSITIVE_REGULATION_OF_CELL_CELL_ADHESION		212	0.487071	2.38965	0	0	0	2207	tags=36%, list=16%, signal=42%
GO_CD4_POSITIVE_ALPHA_BETA_T_CELL_ACTIVATION	GO_CD4_POSITIVE_ALPHA_BETA_T_CELL_ACTIVATION		80	0.563919	2.38555	0	0	0	2142	tags=44%, list=15%, signal=51%
GO_NATURAL_KILLER_CELL_MEDIATED_IMMUNITY	GO_NATURAL_KILLER_CELL_MEDIATED_IMMUNITY		43	0.637953	2.38479	0	0	0	2211	tags=51%, list=16%, signal=61%
GO_MAST_CELL_MEDIATED_IMMUNITY	GO_MAST_CELL_MEDIATED_IMMUNITY		41	0.64585	2.38268	0	0	0	2211	tags=51%, list=16%, signal=61%
GO_ALPHA_BETA_T_CELL_DIFFERENTIATION	GO_ALPHA_BETA_T_CELL_DIFFERENTIATION		91	0.557159	2.37798	0	0	0	2197	tags=44%, list=16%, signal=52%
GO_LYMPHOCYTE_COSTIMULATION	GO_LYMPHOCYTE_COSTIMULATION		51	0.613297	2.37126	0	0	0	1379	tags=43%, list=10%, signal=48%
GO_REGULATION_OF_IMMUNE_EFFECTOR_PROCESS	GO_REGULATION_OF_IMMUNE_EFFECTOR_PROCESS		309	0.460182	2.36989	0	0	0	1969	tags=34%, list=14%, signal=38%
GO_NEGATIVE_REGULATION_OF_IMMUNE_RESPONSE	GO_NEGATIVE_REGULATION_OF_IMMUNE_RESPONSE		118	0.523803	2.36769	0	0	0	3111	tags=53%, list=22%, signal=68%
GO_POSITIVE_REGULATION_OF_LIPID_KINASE_ACTIVITY	GO_POSITIVE_REGULATION_OF_LIPID_KINASE_ACTIVITY		34	0.66443	2.35852	0	0	0	1281	tags=38%, list=9%, signal=42%
GO_LYMPHOCYTE_ACTIVATION_INVOLVED_IN_IMMUNE_RESPONSE	GO_LYMPHOCYTE_ACTIVATION_INVOLVED_IN_IMMUNE_RESPONSE		137	0.513426	2.35566	0	0	0	2142	tags=41%, list=15%, signal=48%
GO_ACTIVATION_OF_PHOSPHOLIPASE_C_ACTIVITY	GO_ACTIVATION_OF_PHOSPHOLIPASE_C_ACTIVITY		27	0.705467	2.35071	0	0	0	2194	tags=44%, list=16%, signal=53%
GO_LYMPHOCYTE_DIFFERENTIATION	GO_LYMPHOCYTE_DIFFERENTIATION		302	0.459199	2.35063	0	0	0	3232	tags=45%, list=23%, signal=58%
GO_HUMORAL_IMMUNE_RESPONSE_MEDIATED_BY_CIRCULATING_IMMUNOGLOBULIN	GO_HUMORAL_IMMUNE_RESPONSE_MEDIATED_BY_CIRCULATING_IMMUNOGLOBULIN		39	0.649051	2.34875	0	0	0	3134	tags=62%, list=22%, signal=79%
GO_CD4_POSITIVE_ALPHA_BETA_T_CELL_DIFFERENTIATION	GO_CD4_POSITIVE_ALPHA_BETA_T_CELL_DIFFERENTIATION		67	0.568875	2.33738	0	0	0	2142	tags=46%, list=15%, signal=54%
GO_IMMUNOLOGICAL_SYNAPSE	GO_IMMUNOLOGICAL_SYNAPSE		34	0.649475	2.33258	0	2.06701e-05	0.001	243	tags=38%, list=2%, signal=39%
GO_POSITIVE_REGULATION_OF_CELL_KILLING	GO_POSITIVE_REGULATION_OF_CELL_KILLING		45	0.610185	2.32646	0	2.028e-05	0.001	1558	tags=44%, list=11%, signal=50%
GO_DEFENSE_RESPONSE_TO_BACTERIUM	GO_DEFENSE_RESPONSE_TO_BACTERIUM		133	0.506672	2.32261	0	3.92013e-05	0.002	1976	tags=39%, list=14%, signal=45%
GO_REGULATION_OF_B_CELL_RECEPTOR_SIGNALING_PATHWAY	GO_REGULATION_OF_B_CELL_RECEPTOR_SIGNALING_PATHWAY		22	0.729853	2.32217	0	3.84885e-05	0.002	750	tags=50%, list=5%, signal=53%
GO_POSITIVE_REGULATION_OF_T_CELL_PROLIFERATION	GO_POSITIVE_REGULATION_OF_T_CELL_PROLIFERATION		71	0.562234	2.32116	0	3.78012e-05	0.002	1941	tags=42%, list=14%, signal=49%
GO_LYMPHOCYTE_MIGRATION	GO_LYMPHOCYTE_MIGRATION		85	0.546951	2.32064	0	3.7138e-05	0.002	1925	tags=41%, list=14%, signal=47%
GO_CELL_CHEMOTAXIS	GO_CELL_CHEMOTAXIS		231	0.46556	2.31705	0	3.64977e-05	0.002	3781	tags=51%, list=27%, signal=68%
GO_REGULATION_OF_ALPHA_BETA_T_CELL_ACTIVATION	GO_REGULATION_OF_ALPHA_BETA_T_CELL_ACTIVATION		79	0.546821	2.3156	0	3.58791e-05	0.002	2240	tags=43%, list=16%, signal=51%
GO_LEUKOCYTE_CHEMOTAXIS	GO_LEUKOCYTE_CHEMOTAXIS		166	0.484072	2.31501	0	3.52811e-05	0.002	3750	tags=55%, list=27%, signal=74%
GO_ACTIVATION_OF_IMMUNE_RESPONSE	GO_ACTIVATION_OF_IMMUNE_RESPONSE		496	0.432441	2.31421	0	3.47028e-05	0.002	3151	tags=42%, list=22%, signal=52%
GO_POSITIVE_REGULATION_OF_LEUKOCYTE_PROLIFERATION	GO_POSITIVE_REGULATION_OF_LEUKOCYTE_PROLIFERATION		106	0.521449	2.31014	0	3.4143e-05	0.002	2161	tags=42%, list=15%, signal=49%
GO_POSITIVE_REGULATION_OF_ANTIGEN_RECEPTOR_MEDIATED_SIGNALING_PATHWAY	GO_POSITIVE_REGULATION_OF_ANTIGEN_RECEPTOR_MEDIATED_SIGNALING_PATHWAY		20	0.741555	2.30521	0	3.36011e-05	0.002	1307	tags=55%, list=9%, signal=61%
GO_INTERLEUKIN_1_BETA_PRODUCTION	GO_INTERLEUKIN_1_BETA_PRODUCTION		65	0.563012	2.29975	0	3.30761e-05	0.002	3082	tags=46%, list=22%, signal=59%
GO_T_HELPER_1_TYPE_IMMUNE_RESPONSE	GO_T_HELPER_1_TYPE_IMMUNE_RESPONSE		38	0.631573	2.29421	0	3.25672e-05	0.002	2142	tags=55%, list=15%, signal=65%
GO_REGULATION_OF_HUMORAL_IMMUNE_RESPONSE	GO_REGULATION_OF_HUMORAL_IMMUNE_RESPONSE		50	0.592279	2.291	0	4.83352e-05	0.003	1969	tags=42%, list=14%, signal=49%
GO_REGULATION_OF_LEUKOCYTE_MEDIATED_IMMUNITY	GO_REGULATION_OF_LEUKOCYTE_MEDIATED_IMMUNITY		154	0.489607	2.28518	0	6.34566e-05	0.004	2211	tags=40%, list=16%, signal=46%
GO_REGULATION_OF_LYMPHOCYTE_DIFFERENTIATION	GO_REGULATION_OF_LYMPHOCYTE_DIFFERENTIATION		148	0.48875	2.27763	0	6.25234e-05	0.004	3127	tags=47%, list=22%, signal=59%
GO_MYELOID_LEUKOCYTE_MIGRATION	GO_MYELOID_LEUKOCYTE_MIGRATION		151	0.484798	2.27754	0	6.16173e-05	0.004	3765	tags=54%, list=27%, signal=73%
GO_RESPIRATORY_BURST	GO_RESPIRATORY_BURST		28	0.677839	2.27714	0	6.0737e-05	0.004	1177	tags=50%, list=8%, signal=54%
GO_T_CELL_DIFFERENTIATION_INVOLVED_IN_IMMUNE_RESPONSE	GO_T_CELL_DIFFERENTIATION_INVOLVED_IN_IMMUNE_RESPONSE		61	0.565995	2.2766	0	5.98816e-05	0.004	2142	tags=44%, list=15%, signal=52%
GO_DEFENSE_RESPONSE_TO_GRAM_POSITIVE_BACTERIUM	GO_DEFENSE_RESPONSE_TO_GRAM_POSITIVE_BACTERIUM		47	0.595632	2.26451	0	8.86132e-05	0.006	1969	tags=45%, list=14%, signal=52%
GO_REGULATION_OF_PHOSPHOLIPASE_C_ACTIVITY	GO_REGULATION_OF_PHOSPHOLIPASE_C_ACTIVITY		40	0.616357	2.26422	0	8.73993e-05	0.006	2194	tags=38%, list=16%, signal=44%
GO_CYTOKINE_SECRETION	GO_CYTOKINE_SECRETION		175	0.469142	2.26288	0	8.62182e-05	0.006	3269	tags=46%, list=23%, signal=59%
GO_REGULATION_OF_CELL_CELL_ADHESION	GO_REGULATION_OF_CELL_CELL_ADHESION		333	0.438119	2.26272	0	8.50687e-05	0.006	3121	tags=40%, list=22%, signal=50%
GO_CYTOKINE_RECEPTOR_ACTIVITY	GO_CYTOKINE_RECEPTOR_ACTIVITY		87	0.529559	2.26038	0	8.39493e-05	0.006	2622	tags=45%, list=19%, signal=55%
GO_IMMUNE_RESPONSE_REGULATING_SIGNALING_PATHWAY	GO_IMMUNE_RESPONSE_REGULATING_SIGNALING_PATHWAY		466	0.422113	2.2592	0	8.28591e-05	0.006	2299	tags=35%, list=16%, signal=40%
GO_IMMUNE_RESPONSE_REGULATING_CELL_SURFACE_RECEPTOR_SIGNALING_PATHWAY	GO_IMMUNE_RESPONSE_REGULATING_CELL_SURFACE_RECEPTOR_SIGNALING_PATHWAY		325	0.43979	2.25727	0	9.52382e-05	0.007	2299	tags=35%, list=16%, signal=41%
GO_LIPOPOLYSACCHARIDE_MEDIATED_SIGNALING_PATHWAY	GO_LIPOPOLYSACCHARIDE_MEDIATED_SIGNALING_PATHWAY		52	0.571472	2.25346	0	0.000120793	0.009	2800	tags=52%, list=20%, signal=65%
GO_NEGATIVE_REGULATION_OF_CYTOKINE_PRODUCTION	GO_NEGATIVE_REGULATION_OF_CYTOKINE_PRODUCTION		222	0.45583	2.25078	0	0.000119283	0.009	3179	tags=47%, list=23%, signal=60%
GO_NEGATIVE_REGULATION_OF_IMMUNE_SYSTEM_PROCESS	GO_NEGATIVE_REGULATION_OF_IMMUNE_SYSTEM_PROCESS		370	0.432627	2.24781	0	0.000130801	0.01	2759	tags=40%, list=20%, signal=49%
GO_INTERLEUKIN_12_PRODUCTION	GO_INTERLEUKIN_12_PRODUCTION		48	0.588169	2.24761	0	0.000129206	0.01	3037	tags=60%, list=22%, signal=77%
GO_REGULATION_OF_MAST_CELL_ACTIVATION	GO_REGULATION_OF_MAST_CELL_ACTIVATION		34	0.635228	2.24565	0	0.000127649	0.01	1339	tags=41%, list=10%, signal=45%
GO_INTERLEUKIN_17_PRODUCTION	GO_INTERLEUKIN_17_PRODUCTION		27	0.662101	2.24157	0	0.000138743	0.011	1558	tags=48%, list=11%, signal=54%
GO_POSITIVE_REGULATION_OF_LEUKOCYTE_MIGRATION	GO_POSITIVE_REGULATION_OF_LEUKOCYTE_MIGRATION		111	0.500373	2.23889	0	0.000149566	0.012	1969	tags=37%, list=14%, signal=43%
GO_PHAGOCYTOSIS	GO_PHAGOCYTOSIS		229	0.447418	2.23821	0	0.000147827	0.012	2725	tags=40%, list=19%, signal=49%
GO_CYTOKINE_BINDING	GO_CYTOKINE_BINDING		111	0.499156	2.23773	0	0.000146128	0.012	1921	tags=36%, list=14%, signal=41%
GO_LEUKOCYTE_DIFFERENTIATION	GO_LEUKOCYTE_DIFFERENTIATION		444	0.419659	2.23651	0	0.000156623	0.013	3275	tags=42%, list=23%, signal=53%
GO_MONONUCLEAR_CELL_MIGRATION	GO_MONONUCLEAR_CELL_MIGRATION		60	0.563847	2.23546	0	0.000166626	0.014	1418	tags=38%, list=10%, signal=42%
GO_REGULATION_OF_LEUKOCYTE_DIFFERENTIATION	GO_REGULATION_OF_LEUKOCYTE_DIFFERENTIATION		233	0.447692	2.23519	0	0.000164775	0.014	3275	tags=44%, list=23%, signal=56%
GO_NEGATIVE_REGULATION_OF_CD4_POSITIVE_ALPHA_BETA_T_CELL_ACTIVATION	GO_NEGATIVE_REGULATION_OF_CD4_POSITIVE_ALPHA_BETA_T_CELL_ACTIVATION		23	0.688972	2.23436	0	0.000162964	0.014	1148	tags=43%, list=8%, signal=47%
GO_REGULATION_OF_T_CELL_DIFFERENTIATION	GO_REGULATION_OF_T_CELL_DIFFERENTIATION		121	0.494263	2.23254	0	0.000161193	0.014	3111	tags=45%, list=22%, signal=58%
GO_REGULATION_OF_LEUKOCYTE_MIGRATION	GO_REGULATION_OF_LEUKOCYTE_MIGRATION		167	0.46692	2.23232	0	0.00015946	0.014	3750	tags=51%, list=27%, signal=69%
GO_POSITIVE_REGULATION_OF_ALPHA_BETA_T_CELL_ACTIVATION	GO_POSITIVE_REGULATION_OF_ALPHA_BETA_T_CELL_ACTIVATION		54	0.570065	2.22839	0	0.000169076	0.015	1576	tags=39%, list=11%, signal=44%
GO_T_CELL_MIGRATION	GO_T_CELL_MIGRATION		55	0.56579	2.227	0	0.000167296	0.015	2107	tags=47%, list=15%, signal=55%
GO_POSITIVE_REGULATION_OF_LIPASE_ACTIVITY	GO_POSITIVE_REGULATION_OF_LIPASE_ACTIVITY		60	0.552659	2.2232	0	0.000165554	0.015	2632	tags=37%, list=19%, signal=45%
GO_HUMORAL_IMMUNE_RESPONSE	GO_HUMORAL_IMMUNE_RESPONSE		130	0.479098	2.22212	0	0.000174675	0.016	2737	tags=42%, list=19%, signal=52%
GO_REGULATION_OF_CELL_KILLING	GO_REGULATION_OF_CELL_KILLING		64	0.550372	2.2208	0	0.000172893	0.016	1941	tags=42%, list=14%, signal=49%
GO_MACROPHAGE_ACTIVATION	GO_MACROPHAGE_ACTIVATION		75	0.523057	2.21693	0	0.000192895	0.018	1969	tags=41%, list=14%, signal=48%
GO_ALPHA_BETA_T_CELL_PROLIFERATION	GO_ALPHA_BETA_T_CELL_PROLIFERATION		28	0.660874	2.21313	0	0.00021205	0.02	2671	tags=61%, list=19%, signal=75%
GO_NEGATIVE_REGULATION_OF_LEUKOCYTE_CELL_CELL_ADHESION	GO_NEGATIVE_REGULATION_OF_LEUKOCYTE_CELL_CELL_ADHESION		96	0.505571	2.20691	0	0.000220357	0.021	1184	tags=34%, list=8%, signal=37%
GO_MONOCYTE_CHEMOTAXIS	GO_MONOCYTE_CHEMOTAXIS		40	0.586834	2.19879	0	0.000228532	0.022	1418	tags=40%, list=10%, signal=44%
GO_INTERLEUKIN_6_PRODUCTION	GO_INTERLEUKIN_6_PRODUCTION		122	0.484498	2.19682	0	0.000246803	0.024	1941	tags=34%, list=14%, signal=40%
GO_MHC_PROTEIN_BINDING	GO_MHC_PROTEIN_BINDING		21	0.696682	2.19633	0	0.00024443	0.024	2726	tags=67%, list=19%, signal=83%
GO_POSITIVE_REGULATION_OF_LYMPHOCYTE_DIFFERENTIATION	GO_POSITIVE_REGULATION_OF_LYMPHOCYTE_DIFFERENTIATION		85	0.514204	2.19291	0	0.000292887	0.029	2161	tags=39%, list=15%, signal=46%
GO_REGULATION_OF_CD4_POSITIVE_ALPHA_BETA_T_CELL_ACTIVATION	GO_REGULATION_OF_CD4_POSITIVE_ALPHA_BETA_T_CELL_ACTIVATION		53	0.566987	2.18801	0	0.000290124	0.029	1558	tags=38%, list=11%, signal=42%
GO_REGULATION_OF_MAST_CELL_ACTIVATION_INVOLVED_IN_IMMUNE_RESPONSE	GO_REGULATION_OF_MAST_CELL_ACTIVATION_INVOLVED_IN_IMMUNE_RESPONSE		25	0.664688	2.1804	0	0.0003177	0.032	641	tags=40%, list=5%, signal=42%
GO_IMMUNOGLOBULIN_SECRETION	GO_IMMUNOGLOBULIN_SECRETION		18	0.721753	2.17737	0	0.00032454	0.033	1522	tags=50%, list=11%, signal=56%
GO_GRANULOCYTE_MIGRATION	GO_GRANULOCYTE_MIGRATION		96	0.503705	2.17419	0	0.000331366	0.034	1969	tags=41%, list=14%, signal=47%
GO_SIDE_OF_MEMBRANE	GO_SIDE_OF_MEMBRANE		411	0.409289	2.17139	0	0.000347392	0.035	1930	tags=29%, list=14%, signal=33%
GO_POSITIVE_REGULATION_OF_INTERLEUKIN_12_PRODUCTION	GO_POSITIVE_REGULATION_OF_INTERLEUKIN_12_PRODUCTION		30	0.630277	2.17124	0	0.000344262	0.035	2757	tags=57%, list=20%, signal=70%
GO_REGULATION_OF_ADAPTIVE_IMMUNE_RESPONSE	GO_REGULATION_OF_ADAPTIVE_IMMUNE_RESPONSE		129	0.470344	2.16627	0	0.000350842	0.036	2254	tags=40%, list=16%, signal=47%
GO_POSITIVE_REGULATION_OF_LEUKOCYTE_MEDIATED_CYTOTOXICITY	GO_POSITIVE_REGULATION_OF_LEUKOCYTE_MEDIATED_CYTOTOXICITY		34	0.605251	2.16458	0	0.000366461	0.038	1925	tags=47%, list=14%, signal=54%
GO_POSITIVE_REGULATION_OF_INTERLEUKIN_10_PRODUCTION	GO_POSITIVE_REGULATION_OF_INTERLEUKIN_10_PRODUCTION		27	0.630338	2.15795	0	0.000391269	0.041	1851	tags=63%, list=13%, signal=72%
GO_NEGATIVE_REGULATION_OF_CYTOKINE_SECRETION	GO_NEGATIVE_REGULATION_OF_CYTOKINE_SECRETION		47	0.561234	2.15783	0	0.000387866	0.041	3732	tags=62%, list=26%, signal=84%
GO_NEGATIVE_REGULATION_OF_TUMOR_NECROSIS_FACTOR_SUPERFAMILY_CYTOKINE_PRODUCTION	GO_NEGATIVE_REGULATION_OF_TUMOR_NECROSIS_FACTOR_SUPERFAMILY_CYTOKINE_PRODUCTION		50	0.564539	2.15744	0	0.000384523	0.041	3041	tags=54%, list=22%, signal=69%
GO_INTERLEUKIN_1_PRODUCTION	GO_INTERLEUKIN_1_PRODUCTION		75	0.513466	2.15308	0	0.000426508	0.046	3082	tags=43%, list=22%, signal=54%
GO_LEUKOCYTE_ACTIVATION_INVOLVED_IN_INFLAMMATORY_RESPONSE	GO_LEUKOCYTE_ACTIVATION_INVOLVED_IN_INFLAMMATORY_RESPONSE		38	0.583948	2.15287	0	0.000422893	0.046	1969	tags=45%, list=14%, signal=52%
GO_POSITIVE_REGULATION_OF_TUMOR_NECROSIS_FACTOR_SUPERFAMILY_CYTOKINE_PRODUCTION	GO_POSITIVE_REGULATION_OF_TUMOR_NECROSIS_FACTOR_SUPERFAMILY_CYTOKINE_PRODUCTION		75	0.510123	2.15155	0	0.000428172	0.047	1941	tags=39%, list=14%, signal=45%
GO_GLYCOLIPID_BINDING	GO_GLYCOLIPID_BINDING		18	0.720457	2.15046	0	0.000424604	0.047	1191	tags=50%, list=8%, signal=55%
GO_REGULATION_OF_LEUKOCYTE_DEGRANULATION	GO_REGULATION_OF_LEUKOCYTE_DEGRANULATION		34	0.608823	2.15018	0	0.000421095	0.047	1889	tags=44%, list=13%, signal=51%
GO_DETECTION_OF_EXTERNAL_BIOTIC_STIMULUS	GO_DETECTION_OF_EXTERNAL_BIOTIC_STIMULUS		16	0.726142	2.14913	0	0.000426319	0.048	1260	tags=56%, list=9%, signal=62%
GO_GLIAL_CELL_ACTIVATION	GO_GLIAL_CELL_ACTIVATION		46	0.558746	2.14913	0	0.000422853	0.048	2240	tags=46%, list=16%, signal=54%
GO_POSITIVE_REGULATION_OF_CYTOKINE_PRODUCTION	GO_POSITIVE_REGULATION_OF_CYTOKINE_PRODUCTION		372	0.410638	2.14911	0	0.000419443	0.048	3008	tags=39%, list=21%, signal=49%
GO_COMPLEMENT_ACTIVATION	GO_COMPLEMENT_ACTIVATION		48	0.565581	2.14765	0	0.000424463	0.049	3134	tags=48%, list=22%, signal=61%
GO_MACROPHAGE_MIGRATION	GO_MACROPHAGE_MIGRATION		42	0.574398	2.14654	0	0.000421094	0.049	2757	tags=50%, list=20%, signal=62%
GO_POSITIVE_REGULATION_OF_LEUKOCYTE_DIFFERENTIATION	GO_POSITIVE_REGULATION_OF_LEUKOCYTE_DIFFERENTIATION		133	0.466554	2.14229	0	0.000426063	0.05	2258	tags=38%, list=16%, signal=44%
GO_REGULATION_OF_LEUKOCYTE_MEDIATED_CYTOTOXICITY	GO_REGULATION_OF_LEUKOCYTE_MEDIATED_CYTOTOXICITY		49	0.560997	2.14102	0	0.000422735	0.05	3269	tags=57%, list=23%, signal=74%
GO_POSITIVE_REGULATION_OF_LEUKOCYTE_MEDIATED_IMMUNITY	GO_POSITIVE_REGULATION_OF_LEUKOCYTE_MEDIATED_IMMUNITY		102	0.4808	2.13939	0	0.000419458	0.05	2142	tags=38%, list=15%, signal=45%
GO_REGULATION_OF_ACTIN_CYTOSKELETON_REORGANIZATION	GO_REGULATION_OF_ACTIN_CYTOSKELETON_REORGANIZATION		35	0.598664	2.1382	0	0.000416231	0.05	1652	tags=40%, list=12%, signal=45%
GO_POSITIVE_REGULATION_OF_IMMUNE_EFFECTOR_PROCESS	GO_POSITIVE_REGULATION_OF_IMMUNE_EFFECTOR_PROCESS		169	0.448813	2.13803	0	0.000413054	0.05	2142	tags=33%, list=15%, signal=39%
